# Supplementary material for: Rapid determination of the presence of EGFR mutations with DNA-based nanocalipers
Source: Royal Society of Chemistry journal article supplement (doi:10.1039/d3nr02665e), 2023-01-01
Supplement: d3nr02665e1.pdf [file d3nr02665e1.pdf]

## Supporting Information

# Rapid determination of the presence of EGFR mutations with DNA-based nanocalipers

*Kexin Zhang*<sup>1#</sup>, *Zhicheng Huang*<sup>2,3#</sup>, *Yadong Wang*<sup>2,3</sup>, *Jianchao Xue*<sup>2,3</sup>, *Naixin Liang*<sup>2\*</sup>, *Zewen Wei*<sup>1\*</sup>

1 Department of Biomedical Engineering, School of Medical Technology, Beijing Institute of Technology, Beijing 100081, China.

2 Department of Thoracic Surgery, Peking Union Medical College Hospital, Chinese Academy of Medical Sciences and Peking Union Medical College, Beijing 100730, China.

3 Chinese Academy of Medical Sciences and Peking Union Medical College, Beijing 100730, China.

# K.Z. and Z.H. contributed equally to this work.

\*Correspondence should be addressed to Naixin Liang ([pumchnelson@163.com](mailto:pumchnelson@163.com)) and Zewen Wei ([weizewen@bit.edu.cn](mailto:weizewen@bit.edu.cn)).

## Supporting Data S1.

A plane diagram of the three-layered rectangular structure (plotted by the software caDNAo). The essential elements for assembling DNA nanocalipers include M13mp18 scaffold ssDNA (blue) and massive staple strands, in which strands colored gray (named as structural strands) are designed to form the stable structure and 9 strands (colored red, green, and purple; named as positioning strands) are designed to create different given distances of EGF molecules. After being decorated by external nucleotide residues (5'-AAAAAAAAAAAAAAAA-3'), all positioning strands are bound to polyT-linked EGF molecules. For NC-25, the distance between red and green positioning strands is 72 bp $\approx$ 25 nm; For NC-100, the distance between red and purple positioning strands is 296 bp $\approx$ 100 nm.

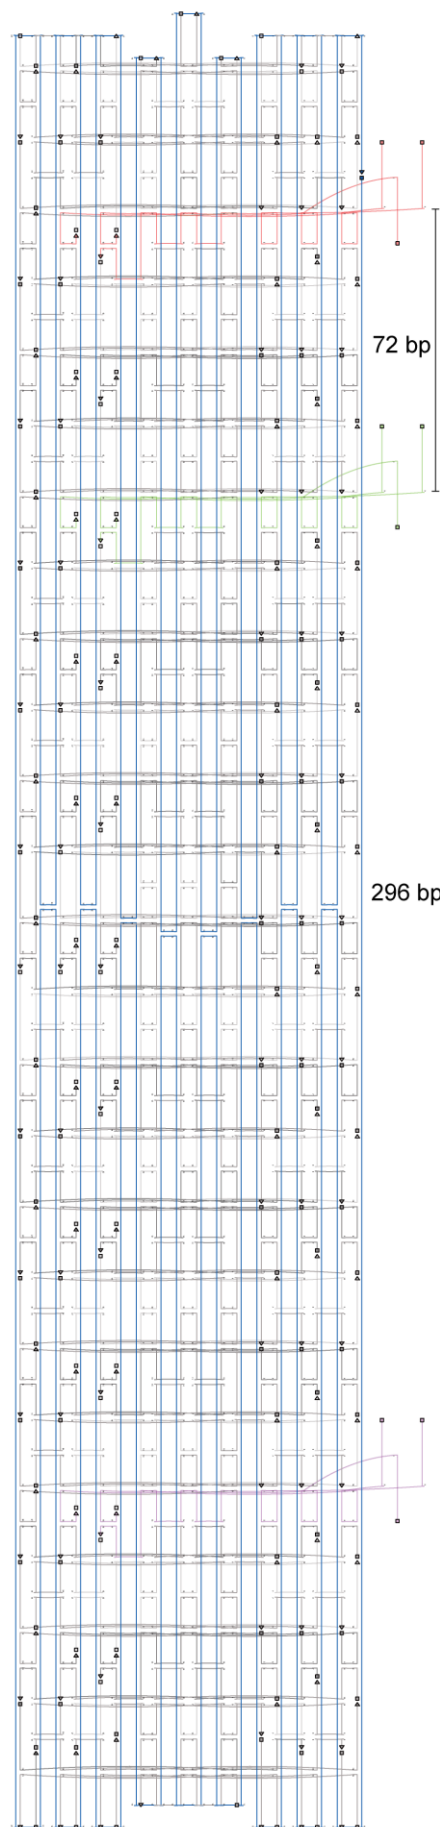

**Supporting Data S2.** Detailed sequences of structural strands and positioning strands.

| Staple strands       | Sequence (5'-3')                                           |
|----------------------|------------------------------------------------------------|
| structural strand 1  | AACGGGTATTAACCAAGTACAAATAATACGTTAAATTGTAGCGGGAGCACGTATAAC  |
| structural strand 2  | TTGTAGCGTAAATGCTTTAAAATATTCCAGGAAGAAAT                     |
| structural strand 3  | CGGAACGAGGGTACAACCTTCTGTTTAGAAAAAATCAGGTCACGTATCGATGA      |
| structural strand 4  | CGGAGTGAGAATACAGCAGCGGCTCATTAATTCATTAGCGGGGAGAGGCGGTT      |
| structural strand 5  | GATGATACAGGAGTGTCAAATGGTAGTTTGACCTATCAGGTGC                |
| structural strand 6  | TGCGTATTTCTGTGTAGGACGTTTTTTGCAACAACTAAAAACCCATG            |
| structural strand 7  | TAATTGCGTTGCGAACGAGTA                                      |
| structural strand 8  | CCGATAGTTGCGCATCAGCTTGCCAAAAGAAGCAAACGGAACGCCAATTCGCA      |
| structural strand 9  | CCACCCTCAGAGCCACATAGATAAAATACCAATCACACACGACCAGTA           |
| structural strand 10 | CAGTATTAACACCGCCACAGAGGTTCTGATTATTAATTTTACCAGAAAGTAAGCA    |
| structural strand 11 | CGGTCCACAAAACGACACATTCAACTAATCTAACAGCTTGGAG                |
| structural strand 12 | CAAAGGGCCCTAAAGGTAGGGCTTTTTATCAAAAATAGCACCCAAAAG           |
| structural strand 13 | AGCAATACTCCATCAGGATAGCTTATGTAATTATCAAGATTTGCGGGAGGTTTTGA   |
| structural strand 14 | TGAATCTTACAAAAACAATGAATCATAGTCAATATAACTCAAACAAAACATC       |
| structural strand 15 | GAATTTCTTAACATAAAAACAGTTAATTTTACAGAGGCGCAGATTCACCAGTGCT    |
| structural strand 16 | TAGGGTTGGGAAGAAAAAAGCCTGTATATGTCTAATATCATAATAA             |
| structural strand 17 | AGAGCCTAATTTGAGAATTGATCCGGCTTAATTACCTGAACAATATATTAGTC      |
| structural strand 18 | CACCAGTGAGCTCGAAAACGAACTAGACGACGACGTTGAACCCTCATT           |
| structural strand 19 | AGAACAAGCAAGCCGTTTTTATTTATCAATACTAGAAGCGAAAGGCAGAGCGGGAGCT |
| structural strand 20 | ATAAAAGGACAACATAAAGGATTTAGAAGTATTGCCACCCTAAAGGGCG          |
| structural strand 21 | AAACAGGATGCAATGCGGCAAAGAATTAGCAACAGGTCAGGCGGGGTT           |
| structural strand 22 | ACCCTTCTGAAGGTTATCGACAACCTCGTATTAGAGCCACCAGGTAAAT          |
| structural strand 23 | AGGAAACGAGGCCGGATATACTTCTTATCAGATGCCACGCTGAGAGCC           |
| structural strand 24 | AAAACACTCATCTTTGACCCCAACCGGATTACCAGTCGAAATTGTCATTCAGGCTGCG |
| structural strand 25 | AAGTCAGAGGGTACCCAATCCATCATAATCAATAGATAAAGAATAGCCCGAGA      |
| structural strand 26 | TGACAGGAGGTTGAGGAATTAAGCGGCTTAGATAAGCAAAGCCAGCTT           |
| structural strand 27 | TGTACCCCAAAAAGGGTAGCATTAAACATCCAACAAATAAAGCTGAGAC          |
| structural strand 28 | GCCATTAAATGAAAAAGCGGAATTATCATCATTTAGCGTCACCATTAC           |
| structural strand 29 | GGATTTGCTAAAGCAACGGCTTGTGAATTCATTCAGCGTGCCAGCTGCATTA       |
| structural strand 30 | GCGCATCGGCTGTCTTTTCCTTAGAAACCAGGTTTGAACCGCCGCGCTTAACAC     |
| structural strand 31 | GGAATCATTACCGCGCCAATACAACATGTTATACAACGGCGAACGGGATTTTAGACA  |
| structural strand 32 | AGTCCACTGGGAAAGCATTCTTACTTTTAACCGTTAAGCCTTACGCAG           |

|                      |                                                             |
|----------------------|-------------------------------------------------------------|
| structural strand 33 | AGGTGGCAAAATTATTCGTCAGATGCCCCGAACAATCAACAGTTGAAAG           |
| structural strand 34 | TACCGTTCAGTAAGCCATTTGGGGTTGATTCACAAGAGATGGTGTAG             |
| structural strand 35 | AGGCTTGCAGGGAATTTTTTCATAAAAACAGAGGAAGTGAGCGAGAGCCCCAA       |
| structural strand 36 | TCACCGCCGCAGGTCGGAAGATTTAAGAGCAAGGAGCCTCACCTCA              |
| structural strand 37 | TAATAAGAGCAAGCGCTAACGAGCCAACGATTCTGTACGTGGACTCCAACGT        |
| structural strand 38 | TCTGAAACCACTGAGTATTATAGTTTGCCAGACCATTGCTATCCGCT             |
| structural strand 39 | CGCCTCCCTCAGAGCCAGACTTTAAGAAACAAGGCCAACATCTGAAAT            |
| structural strand 40 | AGAATCAAGTTTGCCTATTCCTGATGAATAATAACGAACCAACATCAC            |
| structural strand 41 | TATGTTAGACCGACTTAATAAAGAAACATTATCAAACCCCTCAATCAAT           |
| structural strand 42 | TTGTAAACTAAAAATTCTCAGAGCATAAAGCTGAGCCGCCCGCTCGA             |
| structural strand 43 | GAGGGTTGCCACCCTCCAGACCGGAATTACGGCGATTAACCAAGCTT             |
| structural strand 44 | ACGGTAATTCACCATCTGAAAAGGTGGCATCAGCGCAGTCCCTATTAT            |
| structural strand 45 | AGAGTCTGTTCTTTGACGCTATTAGTTTGATAACGTCACGTAGCGAC             |
| structural strand 46 | CCATCGATAACAAAGTTCCCTTAGAATCC                               |
| structural strand 47 | AACCTAAAACGAAAGAGGCCAAAAAGCTGCTACCTTATATACGAGCTGGTGCCGGAAAC |
| structural strand 48 | ACTACAACCCTGCCTAATATAACAGCGCGAGCAATATGATATTCAACC            |
| structural strand 49 | TGTCGTCTTCCAGACGT                                           |
| structural strand 50 | TAGACGGGAGAATACGTCAAAAAATAAGGTCCCATCCGTTCCGAAATCGGCAA       |
| structural strand 51 | TTCAGGGAAGAAGGATTAATGCTGACAGGCAACTGAGTAATGTGTAGG            |
| structural strand 52 | CAGCCTTACAGAGAGAATAAAATTTAATATCAATAAGCCCCAGCAGGCGAAA        |
| structural strand 53 | ACAGTATCGGCCTATTGAATCGTAAATTGTGAGGAAGTTTCC                  |
| structural strand 54 | CAGTCGGGAAAGCCTGATTTCAACACTGCGGATTTTCTGTAGACAGCC            |
| structural strand 55 | CGCCACGCATAAGCTCCAAAACACTATCTTTAATCTTCTCTGTATATTTAAA        |
| structural strand 56 | ATTAAACGGGTAAAATACGTA                                       |
| structural strand 57 | TAGCTTTTTTCAGGCTTGAGAACACCAGCTCACTGCCCGCTTTC                |
| structural strand 58 | ACATTTGACTGGTAATAAGT                                        |
| structural strand 59 | TTAAATTTTTGCGGGAAAACATTATGACCCTGCACCCTCAGAATAGGT            |
| structural strand 60 | TGAGGACTAAAGATAAATGAAATCGTCATAACAGTTCGGTGCATCTCATTGCC       |
| structural strand 61 | ACATTCAATAAGTTTATACCTGAGGAAAACCTGCTTTGACTCACGCTG            |
| structural strand 62 | AGAAAATTCATATTCAAAATCGCGCATCTTCTAGTTGCGCCGCTACAGGGCGC       |
| structural strand 63 | TCACCGTCCAAACGTATTCATTTGAGGTTGGGCGATTAAAGTGGCGAG            |
| structural strand 64 | GAGTGAGCTAACTCACAT                                          |
| structural strand 65 | CCATATTATTTATATTGAGCGAAATGCTGACAAAATAAAACGCTAATACGTG        |
| structural strand 66 | AGATCTACAAAGGCATTAGATCCCCTCAACGATCTAAAGTTT                  |
| structural strand 67 | ATTTTGCAAGCCCTTACGCTGAGTAAATCGTTTAGTAATACCAGCAG             |

|                       |                                                            |
|-----------------------|------------------------------------------------------------|
| structural strand 68  | AGAGCCAGTGATTAAGTACATAAAGTCTGAGACCAGAATCGATTAGA            |
| structural strand 69  | TCCTCAAGTAGCAAGCAAAGATTACAAAATAGAAGGGCGACATGGTCA           |
| structural strand 70  | TACCGTAAATGAAAGTAACTAAAGAATAGTAGTGAGAAAGGCCGGAGA           |
| structural strand 71  | TTAACGGGGTCAGTGCC                                          |
| structural strand 72  | CAGATATAGAAGGCTTATCCGGTAAAGTACTCAACAGGAGCCCCCTGAGAAGTGTTT  |
| structural strand 73  | AAAATCACCGGAACCAAATCCTTTGAATATACAGCGTAAGCATGGAAA           |
| structural strand 74  | ATTGACGGACATATAATCAAGAAAATGCAAATGTTAGAATAGCGGGCG           |
| structural strand 75  | GAGATAACCCACACCAGTTACCATATGCGTTCAGCTATCCAGTTTGAACAAG       |
| structural strand 76  | AACTGGCACAAAATCAACCATATCCAGAAGGATCTAAAGCATCACCTT           |
| structural strand 77  | GGATCGTCACCCTGAAAGGAAAAGAAGTTCAGAAGCAGGAACAAACAATCATA      |
| structural strand 78  | ATGAATCGCACACAACGCGATTTTTAGTAAAAACAGTTTCAGTACAA            |
| structural strand 79  | CAGTTTGAGGGGACGACG                                         |
| structural strand 80  | CATTAGCACAATAATATGCTTCTGAAGAGTCAGAGGCCACAGCACTAA           |
| structural strand 81  | AGGAACCAATATCCAACAGGTCAGACACCGTACTCGGT                     |
| structural strand 82  | TGAGAGTCTGATAAATTGTTTAGCTATATTTTGTCCATACATAAACAGT          |
| structural strand 83  | TATCATCGCCTGATAAATTGTGATGAACGTACAGGTAACCTAGAGGGCGAAAGGGGGA |
| structural strand 84  | ATTGTATCGGTTTCGACAATGGAGATTTAACTGACCAAGAGAGTTGCAGCAAG      |
| structural strand 85  | CCAAGCGCGAAACAAAGTACAGGCTGACCGTTAATAATTCGTAATTCGGTGCGGGCCT |
| structural strand 86  | AATCCCTTCTGGCAAGAAGAATAAAAGACAAACACCCTGACAAAGACA           |
| structural strand 87  | AAAGCCAGAATGAAAATTCTACTTACGGTGTTAGCATGTCGGCGGAT            |
| structural strand 88  | ACGCGAGGCGTTTTAGCGAACAGTAATAAAATTTAACATGCCGTAACGAGTAAA     |
| structural strand 89  | TTGAAAACATAGCGCAAATTTAAATCAAG                              |
| structural strand 90  | GTAGGTTTACCAGCGCTTGCTTTGTACATTTGTAGATTAGAGCCGTCA           |
| structural strand 91  | CCACGGAACCGATTGAACATCGGGCAAACAATTCTAAAATATCTTTAG           |
| structural strand 92  | GCTATCTTACCGACCCAGCTAATCGCCATGAGAATATGTCTATCATGGGCGAT      |
| structural strand 93  | TAATGCCCGCCTGTAGCATAAATCCTGGATAGACCGCTCCGGAAGCA            |
| structural strand 94  | CTCCAAAAAAGCCGATATAAACATTATGTGTACAGAACAGCTGATTGCCCT        |
| structural strand 95  | ATCCTGTTACCCACACATACCGACATATTTAGGGAAGCGCAATCAAT            |
| structural strand 96  | TTGCTCAGACCCTCAGTATCGCGTATAACCCTCGCCAGCTGGATCCCC           |
| structural strand 97  | GGCCCACTGGTCGAGGACGCCAACAGATTAAGTTAAGAAAGGAAACCG           |
| structural strand 98  | CCCTTATTAGCGTTTGGTTTGAGTAATTGCGTTGAATGGCTTACCGCC           |
| structural strand 99  | ATTGCGAATAATAGTTAAAGGAAATCTACTTCATCAAGGGTGGTTTTTCTTTT      |
| structural strand 100 | GAACCGCCTACCAGGCTTGCGGATAATAAAGCTTTAGAACCCTCATAT           |
| structural strand 101 | TAAGAGGCGGTACCGTTGT                                        |
| structural strand 102 | GATTTTTGTTTATAACTGAAGAACGCGACAAAAGAAGTCAATCGGAGATAGA       |

|                       |                                                            |
|-----------------------|------------------------------------------------------------|
| structural strand 103 | CCGCCACCAGAACCACCACCAAAATCGGTGCTCCTTTTTGTAAATCAAAA         |
| structural strand 104 | ATGCCACTTGACGAGAATGGTTTAGGGTGCCTTCGCACTCCAGCC              |
| structural strand 105 | GAGAGGGTAGCTATTTTTGAG                                      |
| structural strand 106 | CTCATAGTAGTAACAGGTAGATTCAATAACCTAATGCCG                    |
| structural strand 107 | CCTTGATATTCACAAATAAATCATTAGCTCAAATCAGAAATAACAACC           |
| structural strand 108 | AAGATAAATGCAACAGTGATGGCAATTCATCACGTAATCACAATGAAA           |
| structural strand 109 | TTTTTTGGACGTGAACGAGGCATTTTCGAGCCCTCCCGACTAGTTGCT           |
| structural strand 110 | TTAATGCTCAAATATCATTGCGGAACAAAATTTTCGGTGGAATT               |
| structural strand 111 | AGGTTTAGTACCGATATAAGTCTTTAATTTGTACCAAGAAGCCTTTATTCAA       |
| structural strand 112 | GCGCGTTTTATCGGCGAAACCACAAAATTATATAGCCCTTATCGGCC            |
| structural strand 113 | GATAGCCGAGCCTTAATAG                                        |
| structural strand 114 | CGACCTGCTCCATGTTACTTAGGAACCGAGGAATACCGGCCAGTGGTTGGGTAACGCC |
| structural strand 115 | GCACAGACAGTTGGCAGTTATTAATTTTAAAACCATCTTTGTGAATTA           |
| structural strand 116 | GCTTGACGATTAAAGACAGACGACGACAATAAAGCAAGCATCC                |
| structural strand 117 | GAGCACTAGACATTCTAACGGATATTCAATTTTGTACAT                    |
| structural strand 118 | CGCAAGGAGTTAATATTGATAAGAAAGCGAACAGAACCGCTTA                |
| structural strand 119 | CGTCGGATCTGTTGGGCGAGAGGCGGAAGAACCGCTTTTATA                 |
| structural strand 120 | GGATTATTCTATGGTTTTTCAAATCGTGTGATAATGAAAAAAG                |
| structural strand 121 | TAATTCGCGCTGCAAGAGGCATAGCATCAGTTACAACAACCCG                |
| structural strand 122 | GCATGCCTTGCCCTGACTTTGAAAGAGGACAGTCGAAATCAT                 |
| structural strand 123 | ATGGGCGCTTCCGGCCGTCCAATTTAATCATAACAGAGGACC                 |
| structural strand 124 | TAAAGATTGGTTGATACATGTTTTTGCATCAACCAATAGGGGA                |
| structural strand 125 | TACCTACACTTTCCTCCAATCGCACACCGGAAAATAAGATCG                 |
| structural strand 126 | TTGCTGGTACGGTACGGACTACCTCAGTATAAAGCGTCTTAAT                |
| structural strand 127 | GCTGAACCGCGAACTGTTGCACGTGGAACAGACTCCTTACAA                 |
| structural strand 128 | CTAGGGCGATAAATCAAAGTCCTGAACAAGAACGCACTCAAAC                |
| structural strand 129 | TAAAGTGTAACCTGTTGAATAAGGCTTGCCACGAAGGCCTT                  |
| structural strand 130 | CGCGTAACTGATGGTGTAATTTACGAGCATGTATCATTCTAG                 |
| structural strand 131 | TAGCTGTTGGGCGCCAGAGTAATCTTGACAAGCAGCGATTGCG                |
| structural strand 132 | GTTCTAGCTGGAGCAACCAATTCTAGAATGACCATTCCACATG                |
| structural strand 133 | GAATTGAGGACCTGAAAGTAACAGAACAACAAAGAAACGACA                 |
| structural strand 134 | AAACAACAGGAAATTACATAGGTTTAAACATTAAGTCATAATC                |
| structural strand 135 | AGCATCGTAACAGAAAACGGCGAACGATGCCCCGATGGCTTTT                |
| structural strand 136 | CTTATTAATGCCCGAAAGGCTGAATATAGGATTAACGATTGG                 |
| structural strand 137 | TTAGTAGAAGATGTGAGTGTAGAACCTCCAGTAGCAGACTGTA                |

|                               |                                                               |
|-------------------------------|---------------------------------------------------------------|
| structural strand 138         | CAATCTCCGTGAAGCGGATAAATATGCATTAAGAGTCCTCATT                   |
| structural strand 139         | GGAAATATCCATTTTTAATAAAACAGAGAGCCATTCATAGCC                    |
| structural strand 140         | GTGTTTTGACGGATGATGATACCTTTTGGGAGGGAACCGGAAC                   |
| structural strand 141         | CAGATGGGATAGGTCTTTATTCATTCTTTTCGGAATCTGAATT                   |
| structural strand 142         | GTATACATTGGAATTATTCTCGCCTGACAAAGACACAGAACCG                   |
| structural strand 143         | TGTGTCTGGCCGAGCTTCAGGTCATTTGGATAAGTGCCAGCAT                   |
| structural strand 144         | TAATACTTTTGTAAAGTTGATTAGAGAGTACATAGCCCGGAG                    |
| structural strand 145         | CATTTTTGTTCCTCCGACGCAGATAACATAACGCTTTCGAAGG                   |
| structural strand 146         | GACGTTGTGCTGGTTTGACGGTCAATCATAAGGCCGGAACATA                   |
| structural strand 147         | ATTTTAAAAGATTGTAGCTTAATTACTTCAAAGCCACCAAAT                    |
| structural strand 148         | TCATCAACCGCTATTACGTTTACCAACGGAACCTTCGGTCGTTG                  |
| structural strand 149         | GGGTACCGAGACGGGCACCAGGCGCATAGGCTACGGAGATCTG                   |
| 0 nm positioning strand 1     | AGCAGCAAAAATACCGGGAAGGGTAATAACCTACGGAATAATA                   |
| 0 nm positioning strand 2     | TG CCTGATAATCAGTATAGTGAAAATTGAGACAATTTAAGA                    |
| 0 nm positioning strand 3     | ATCGGAACGAAAAACCAAAGTACCGACAAAAGGTATTCTATCC                   |
| 0 nm-A positioning strand 1   | AAAAAAAAAAAAAAAAAAGCAGCAAAAATACCGGGAAGGGTAATAACCTACGGAATAATA  |
| 0 nm-A positioning strand 2   | AAAAAAAAAAAAAAAAAATTGCCTGATAATCAGTATAGTGAAAATTGAGACAATTTAAGA  |
| 0 nm-A positioning strand 3   | AAAAAAAAAAAAAAAAAATCGGAACGAAAAACCAAAGTACCGACAAAAGGTATTCTATCC  |
| 25 nm positioning strand 1    | ATCTGGTCAATATTTTAGATTTTCTTAACAATGAAAATACAGA                   |
| 25 nm positioning strand 2    | AGCCATTGCAGGAGGCTTATATAATTTAGTATAAAAATAAAGTA                  |
| 25 nm positioning strand 3    | AAAGGAAGAGTGTTGTATGCAGAACGCGCCTGTTTTCATCCAG                   |
| 25 nm-A positioning strand 1  | AAAAAAAAAAAAAAAAAATCTGGTCAATATTTTAGATTTTCTTAACAATGAAAATACAGA  |
| 25 nm-A positioning strand 2  | AAAAAAAAAAAAAAAAAAGCCATTGCAGGAGGCTTATATAATTTAGTATAAAAATAAAGTA |
| 25 nm-A positioning strand 3  | AAAAAAAAAAAAAAAAAAGGAAGAGTGTTGTATGCAGAACGCGCCTGTTTTCATCCAG    |
| 100 nm positioning strand 1   | CAGTCAAACGTAAAACCTGGAAGTCCCTGACTTTCGTCACCAG                   |
| 100 nm positioning strand 2   | TGACCGTAGCAAAGCGGGGGTAAAAGAAGTAAAGACAGACT                     |
| 100 nm positioning strand 3   | CACAATTCGCCAACGCCCCAAATCAACGTAACAAGAATACCAT                   |
| 100 nm-A positioning strand 1 | AAAAAAAAAAAAAAAAACAGTCAAACGTAAAACCTGGAAGTCCCTGACTTTCGTCACCAG  |
| 100 nm-A positioning strand 2 | AAAAAAAAAAAAAAAAATGACCGTAGCAAAGCGGGGGTAAAAGAAGTAAAGACAGACT    |
| 100 nm-A positioning strand 3 | AAAAAAAAAAAAAAAAACACAATTCGCCAACGCCCCAAATCAACGTAACAAGAATACCAT  |
| PolyT                         | TTTTTTTTTTTTTT-SH-C6                                          |

**A**

| Genetic Site                                                      | Cell Bank information |     | Customer sample |     |
|-------------------------------------------------------------------|-----------------------|-----|-----------------|-----|
| (Locus)                                                           | A-549                 |     | A549            |     |
| Amelogenin                                                        | X                     | Y   | X               | X   |
| CSF1PO                                                            | 10                    | 12  | 10              | 12  |
| D13S317                                                           | 11                    | 11  | 11              | 11  |
| D16S539                                                           | 11                    | 12  | 11              | 12  |
| D5S818                                                            | 11                    | 11  | 11              | 11  |
| D7S820                                                            | 8                     | 11  | 8               | 11  |
| THO1                                                              | 8                     | 9.3 | 8               | 9.3 |
| TPOX                                                              | 8                     | 11  | 8               | 11  |
| vWA                                                               | 14                    | 14  | 14              | 14  |
| D21S11                                                            |                       |     | 29              | 29  |
| Percent match between the sample and the database profile: 94.44% |                       |     |                 |     |

**B**

| Genetic Site                                                    | Cell Bank information |    | Customer sample |    |
|-----------------------------------------------------------------|-----------------------|----|-----------------|----|
| (Locus)                                                         | HCC827                |    | HCC827          |    |
| Amelogenin                                                      | X                     | X  | X               | X  |
| CSF1PO                                                          | 11                    | 11 | 11              | 11 |
| D13S317                                                         | 9                     | 9  | 9               | 9  |
| D16S539                                                         | 12                    | 12 | 12              | 12 |
| D5S818                                                          | 12                    | 12 | 12              | 12 |
| D7S820                                                          | 11                    | 12 | 11              | 12 |
| THO1                                                            | 6                     | 6  | 6               | 6  |
| TPOX                                                            | 8                     | 8  | 8               | 8  |
| vWA                                                             | 18                    | 18 | 18              | 18 |
| D21S11                                                          |                       |    | 31              | 31 |
| Percent match between the sample and the database profile: 100% |                       |    |                 |    |

**C**

| Genetic Site                                                   | Cell Bank information |    | Customer sample |    |
|----------------------------------------------------------------|-----------------------|----|-----------------|----|
| (Locus)                                                        | H1975                 |    | H1975           |    |
| Amelogenin                                                     | X                     | X  | X               | X  |
| CSF1PO                                                         | 12                    | 12 | 12              | 12 |
| D13S317                                                        | 10                    | 13 | 10              | 13 |
| D16S539                                                        | 9                     | 12 | 9               | 12 |
| D5S818                                                         | 11                    | 12 | 11              | 12 |
| D7S820                                                         | 8                     | 11 | 8               | 8  |
| THO1                                                           | 7                     | 7  | 7               | 7  |
| TPOX                                                           | 8                     | 11 | 8               | 11 |
| vWA                                                            | 18                    | 18 | 18              | 18 |
| D21S11                                                         |                       |    | 28              | 28 |
| Percent match between the sample and the database profile: 94% |                       |    |                 |    |

**Supporting Data S3.** STR identification results of various lung cancer cell lines. The purities of A549 (A), HCC827 (B) and H1975 (C) were verified by STR identification.



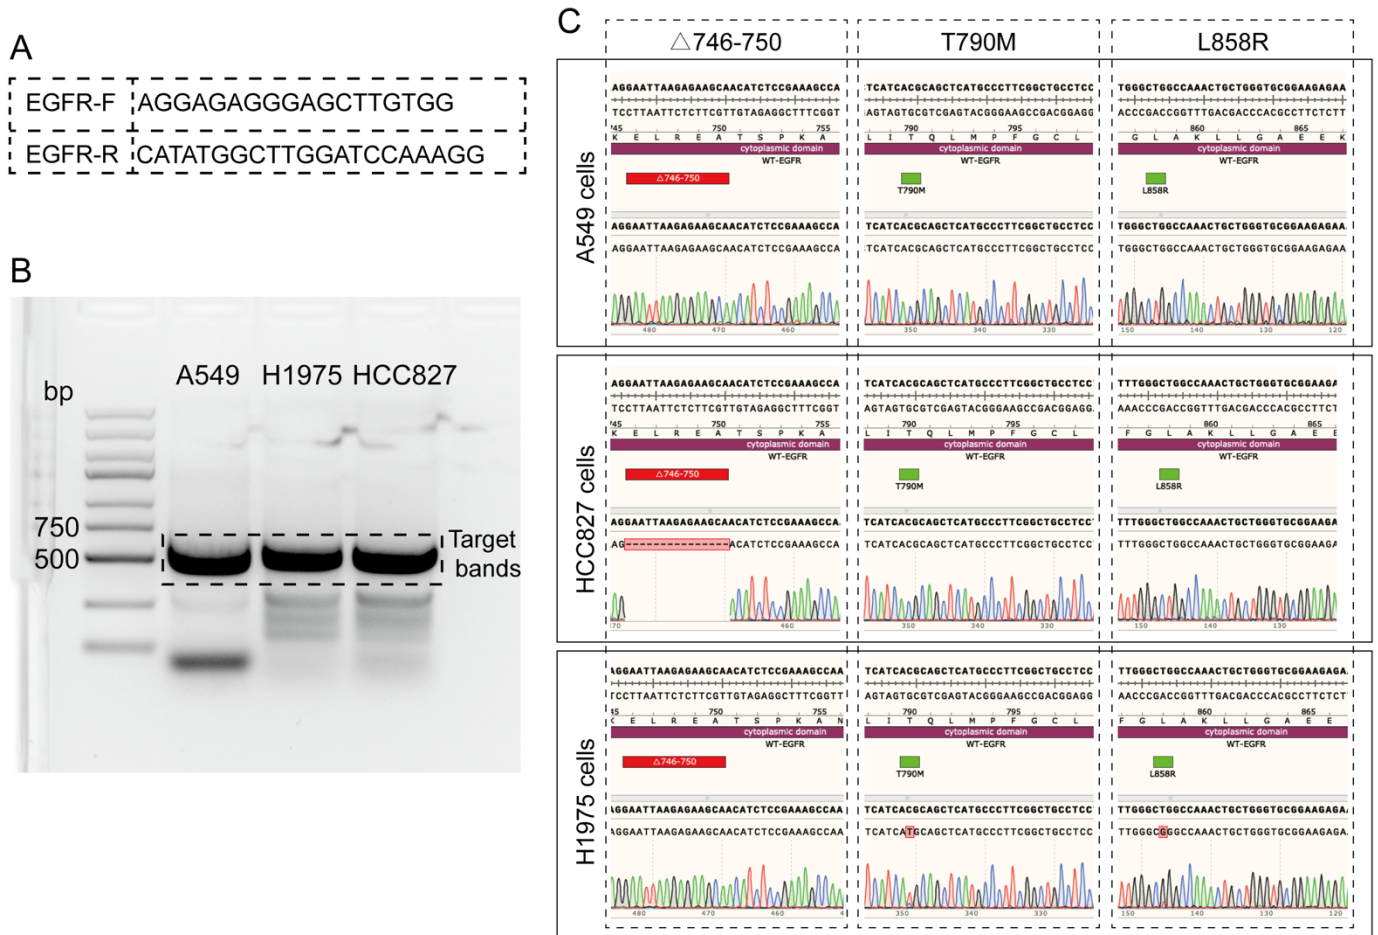

**Supporting Data S4.** Identification of A549, H1975, and HCC827 cell lines. (A) Nucleotide sequences of EGFR-F and EGFR-R primers. (B) The separation of PCR products (in 1% agarose gel) from EGFR-F and EGFR-R primers extensions. Marker: D2000 plus DNA Ladder. (C) Sequencing results of A549, HCC827, and H1975 cells exhibit their EGFR mutation status. The nucleotide sequence of EGFR (Human Gene, NM\_005228.5) was downloaded from the *Ensembl website* and observed by the SnapGene software. Then, EGFR-F primers and EGFR-R primers at the corresponding positions of the shortest sequence fragments (approximately 500 bp) containing the E746\_A750 deletion, L858R, and T790M were designed to compare the differences in the nucleotide sequence of EGFR in the three cell lines. These results demonstrate that no unwanted mutations or cell blending occurred during the culture period of three cell lines.

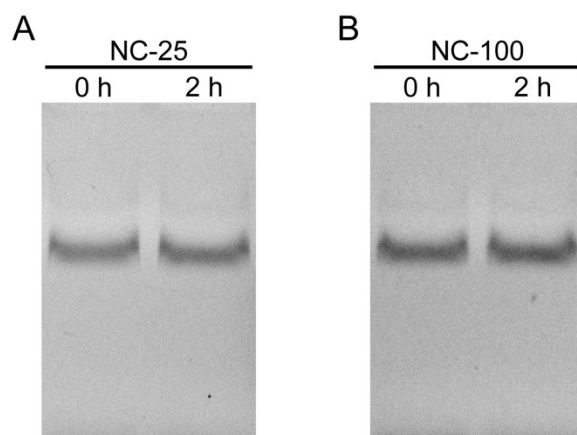

**Supporting Data S5.** Gel electrophoresis (1% agarose) results show the stability of DNA nanocalipers. (A) NC-25 was incubated in the detection environment for 0 h and 2 h. (B) NC-100 was incubated in the detection environment for 0 h and 2 h. The representative gel electrophoresis images show the respective signal expressions among various samples. The signal expression of DNA nanocalipers incubated in the detection environment for 0 h was consistent with that of the 2 h incubation, demonstrating that DNA nanocalipers remained structurally stable within the detection period.

**Supporting Data S6.** Identification of EGFR mutations by NGS and DNA nanocalipers.

| Sample number | NGS               |                              | DNA nanocalipers |
|---------------|-------------------|------------------------------|------------------|
|               | Mutation type     | Amino acid change            |                  |
| 1             | Mutated EGFR      | p. Leu858Arg                 | Mutated EGFR     |
|               | Mutated PTEN      | p. Glu314fs                  |                  |
| 2             | Mutated EGFR      | p. Glu746_Ser752delinsVal    | Mutated EGFR     |
|               | Mutated BAP1      | p. Ile47fs                   |                  |
| 3             | Mutated EGFR      | E21                          | Mutated EGFR     |
|               | Mutated MET       | E2                           |                  |
| 4             | Mutated EGFR      | p. Glu746_Ala750del          | Mutated EGFR     |
|               | Mutated TP53      | p. Arg175His                 |                  |
| 5             | Mutated EGFR      | p. Gly719Ser<br>p. Glu709Ala | Mutated EGFR     |
|               | Mutated PMS1      | p. Gln226*                   |                  |
|               | Mutated RB1       | p. Ser565*                   |                  |
|               | Mutated WRN       | p. Ser1141*                  |                  |
|               | Mutated STK11     | deletion                     |                  |
| 6             | Mutated EGFR      | p. Leu861Gln                 | Mutated EGFR     |
|               | Mutated TP53      | p. Trp53*                    |                  |
|               | Mutated ERBB2     | Amplification                |                  |
| 7             | Mutated TP53      | p. Ser166*                   | Wild-type EGFR   |
| 8             | Wild-type EGFR    | No mutation                  | Wild-type EGFR   |
| 9             | Mutated KIF5B-RET | Fusion                       | Wild-type EGFR   |

Note: The standard of the quality examination offered by the service provider: The minimum DNA content requirement is 10 ng for NGS. The typical cancer/normal cell proportion should reach 25% for NGS.
